# Supplementary material
Source: publisher figshare collection journal article supplement (https://sage.figshare.com/ndownloader/files/13585862)
Supplement: Supplementary file 1 [file 13585862]

# SERVICE LEARNING

## PARTNERING FOR SUCCESS

### LESSONS LEARNED FROM COMMUNITY REPRESENTATIVES IN OCCUPATIONAL THERAPY SERVICE LEARNING

## 1. SET THE STAGE

### AGREE ON THREE C'S OF RECIPROCAL PARTNERSHIP FROM THE START

#### COMMUNAL INTER-DEPENDENCE

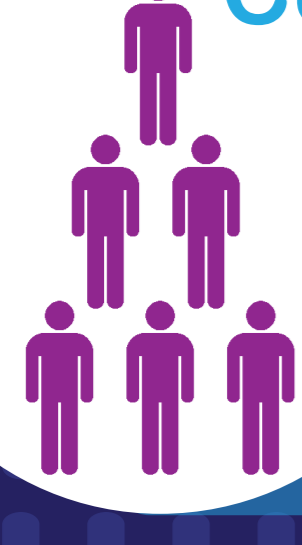

All parties:

- o Depend on one another
- o Influence one another through their actions
- o Benefit from the partnership

} EQUALLY

#### COLLABORATIVE PLANNING AND DECISION-MAKING

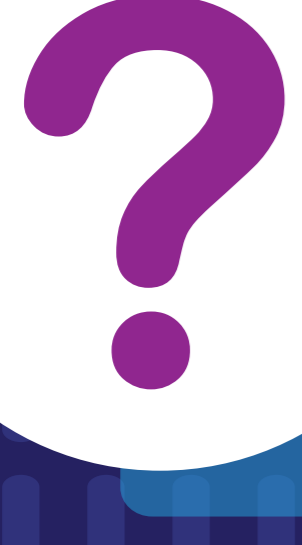

- o What do we have? (try to connect new projects to existing ones)
- o What do we want / need? (all partners must be clear and honest)
- o Decide TOGETHER with all partners on
  - Goals
  - Activities and responsibilities
  - How to evaluate outcomes

#### COMMUNICATION STRATEGIES

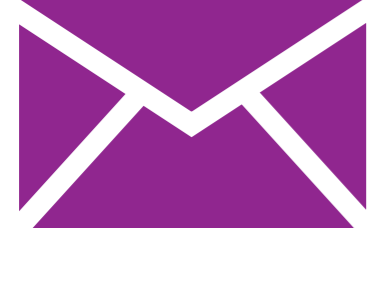

- o Schedule regular communication
- o Agree on how:
  - Face to face
  - Telephone
  - Sms / Whatsapp / Instant messaging
  - E-mail
- o Ensure:
  - Transparency (communicate clearly and honestly)
  - Feedback (everybody is responsible to give feedback regularly)

### FOSTER EQUAL RELATIONSHIPS WHERE THERE IS NO BIG BROTHER

## 2. HOW CAN WE FOSTER RELATIONSHIPS

**Show interest**

**Instill hope**

**Have fun**

**Support dreams**

**Make memories together**

IDEA!

## 3. ACTIVITIES THAT WERE MUTUALLY BENEFICIAL

### MUTUAL BENEFITS

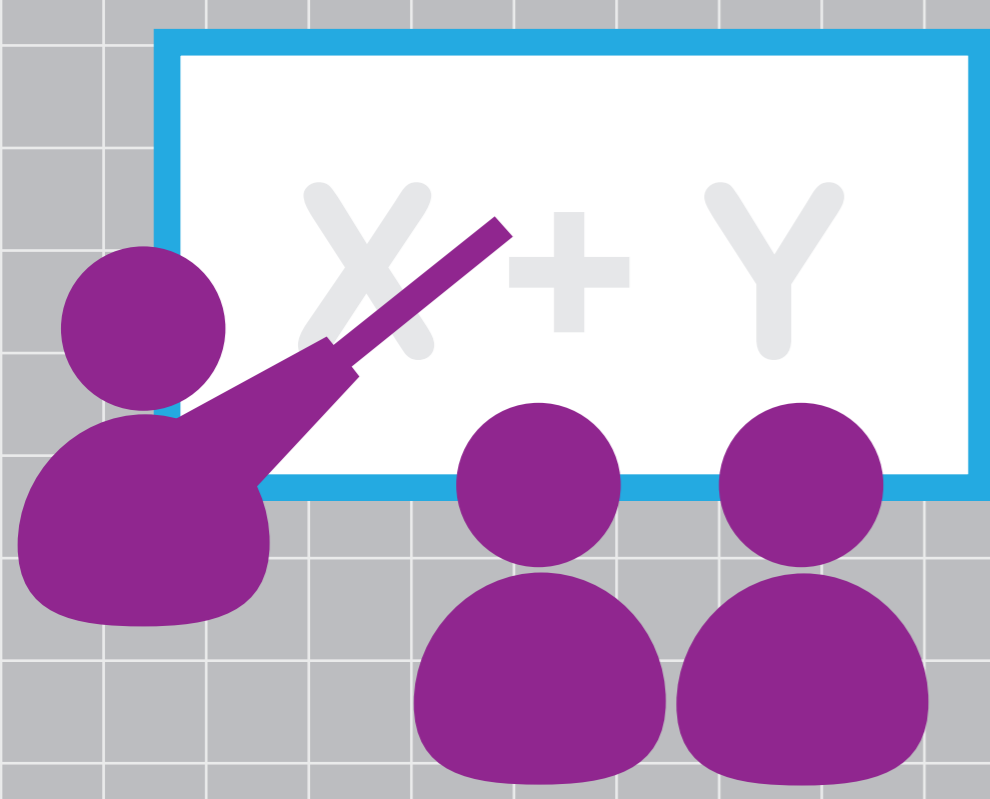

### TRAINING

Sharing knowledge  
Developing skills  
Learn from experience (doing together with)

### INVOLVING THE WIDER COMMUNITY

Get volunteers and other organisations involved in projects

### DELIVERING TANGIBLE PRODUCTS

E.g. manuals, posters, games, activities

### DEVELOPING INFRASTRUCTURE

E.g. stimulation rooms, sensory gardens

## 4. POSITIVE OUTCOMES FROM SERVICE LEARNING PARTNERSHIPS

- All parties learn from one another
- Attitudes change → ways of doing things change
- People have more confidence, hope and a sense of dignity
- People can participate in activities that they want to / need to
- People feel that they belong (students and community members → citizenship)

## 5. POSSIBLE PITFALLS TO AVOID

### THE FIVE I'S

#### INTERMITTENT CONTACT

- o When contact between parties is irregular, relationships suffer and projects fail.

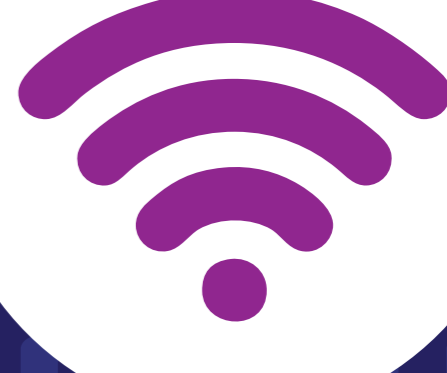

#### IMBALANCE IN POWER

- o When any one party assumes to have less or more power, communal inter-dependence

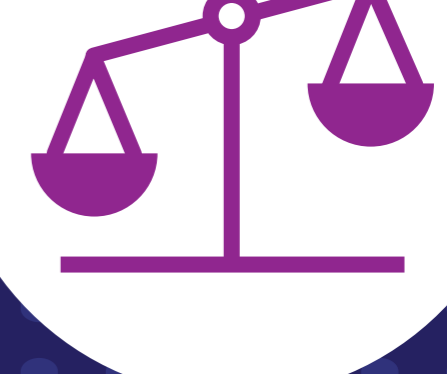

#### INEFFECTIVE MANAGEMENT

- o Poor planning – usually leads to frustration and unsuccessful projects.
- o Trial- and error – when faced with failure upon failure all partners become discouraged.
- o Poor risk management – consider risks from the onset and manage risks pro-actively (from the start)
- o Poor hand-over / exit strategies – make sure that hand-over or exit-strategies for each project are negotiated, even if the partnership continues.

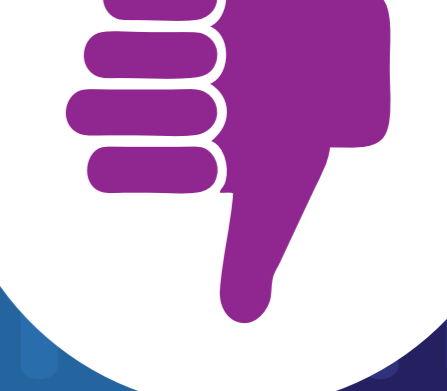

#### INCOMPATIBLE IDEAS AND EXPECTATIONS

- o When ideas and expectations are too different, consider partnering with someone else.

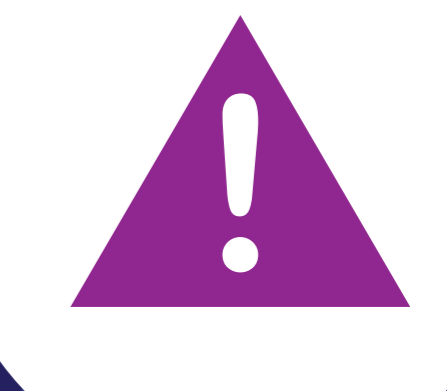

#### IMPAIRING SUSTAINABILITY

- o Poor follow-up – projects that are not followed-up regularly even after completion are not sustainable. Plan for follow-up!
- o High staff turn-over – when there are regular changes in staff or community members, consider ways in which products of the partnership can be carried over to following stakeholders.

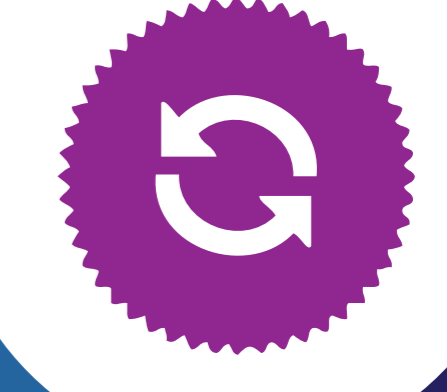

## 6. STUDENTS AS IMPORTANT PARTNERS

### STUDENTS

Positive attributes such as commitment, professionalism, good relationships and high quality service facilitates service learning.

Unpreparedness, risks to personal safety and project failure blocks student and community success in service learning.

POSTER CONTENT COMPILED BY ELIZE JANSE VAN RENSBURG  
UNIVERSITY OF THE FREE STATE  
JANSEVANRENSBURGE@UFS.AC.ZA

DEPARTMENT OF OCCUPATIONAL THERAPY  
051 401 2829

## 7. ACKNOWLEDGEMENTS

- o Participants in the study '*Enabling occupation through service learning: Perceptions of community representatives in Occupational Therapy service learning engagements*' – Thank you for the lessons we could learn from you.
- o Prof. M.A. Erasmus and Mrs. T. Rauch van der Merwe – study leaders.
- o Elfriede Coetzer – Graphic Designing.
- o National Research Foundation (NRF) – partial funding of the study.
